# Supplementary material for: Cochlear implants with dexamethasone-eluting electrode arrays reduce foreign body response in a murine model of cochlear implantation and human subjects
Source: bioRxiv or medRxiv preprint supplement (doi:10.1101/2024.10.11.24315311), 2024-10-13

**A****Genes by Count**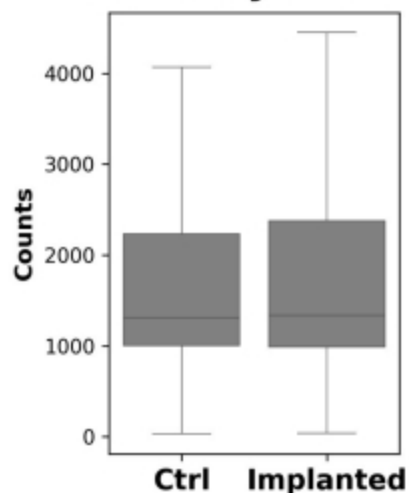**B****Total Counts**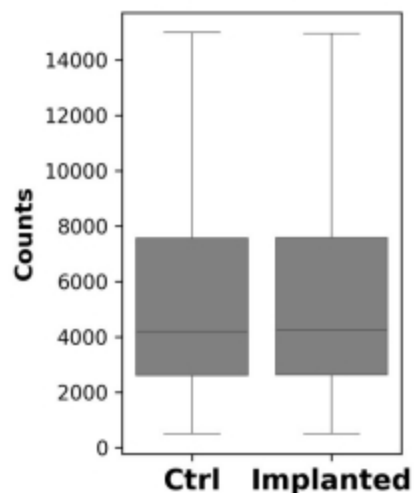**C****Mt percent**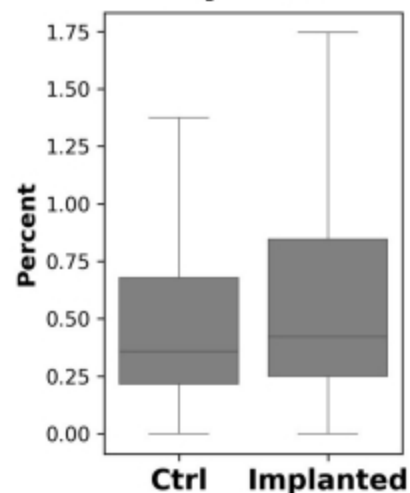**D****Cell Counts After Sequential Filtering**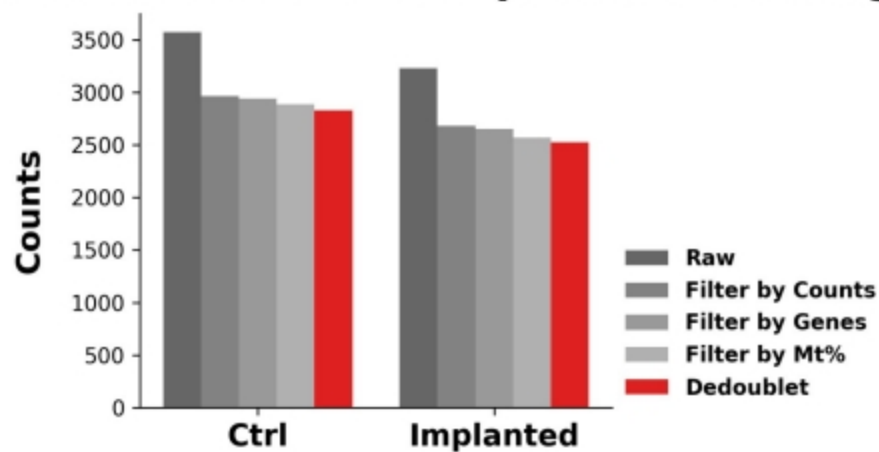

Supplement: Supplementary file [file media-2.pdf]
