# Supplementary material for: Cochlear implants with dexamethasone-eluting electrode arrays reduce foreign body response in a murine model of cochlear implantation and human subjects
Source: bioRxiv or medRxiv preprint supplement (doi:10.1101/2024.10.11.24315311), 2024-10-13

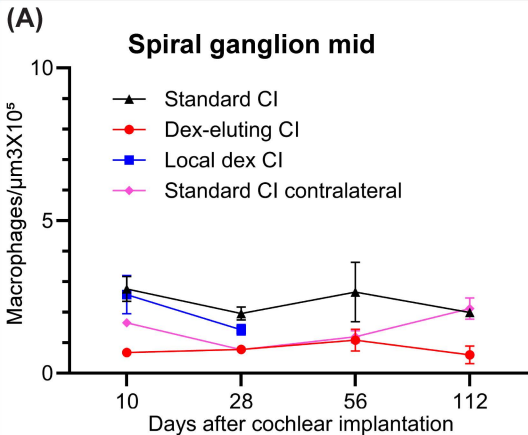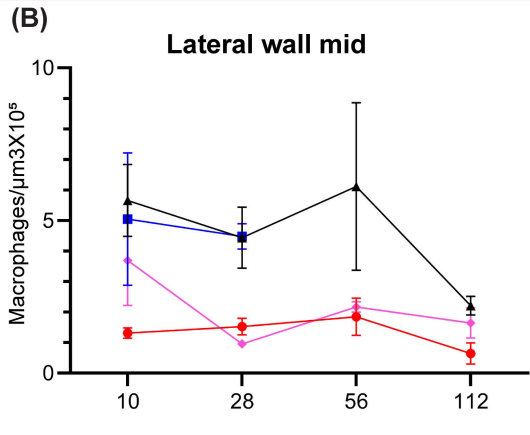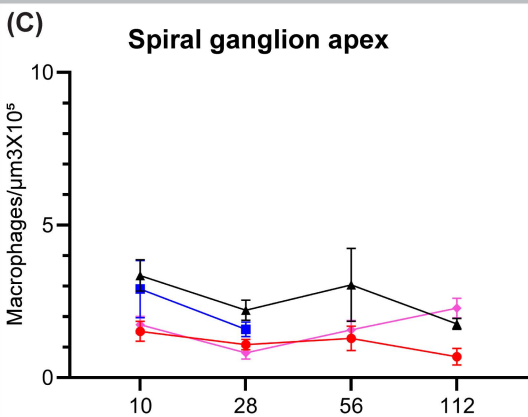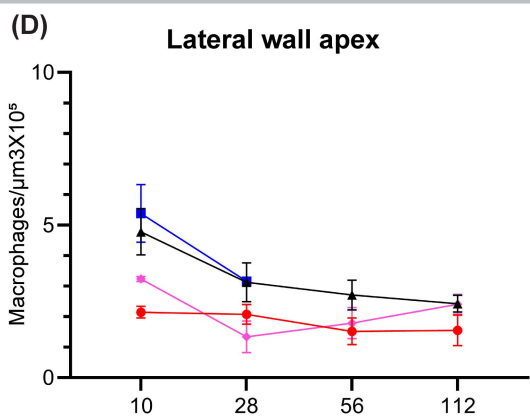

Supplement: Supplementary file [file media-3.pdf]
